# Supplementary material
Source: PubMed Central journal article supplement (PMC3047816)
Supplement: cc0924_4941SD1.pdf [file cc0924_4941SD1.pdf]

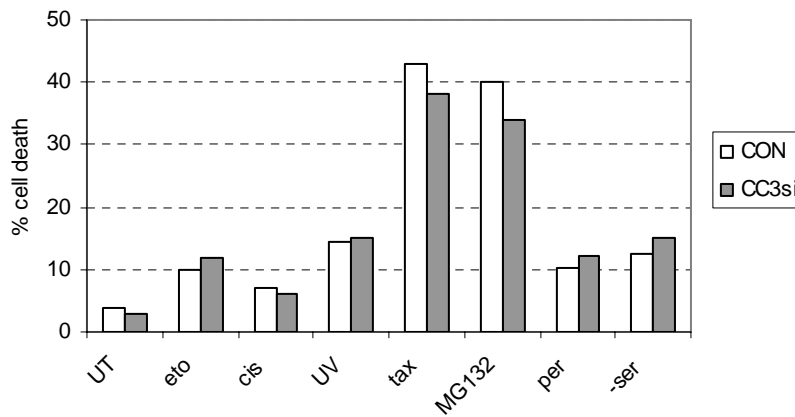

**Fig. S1.** HeLa lines were subjected to the indicated treatments for 24 hours, and cell death was analyzed by flow cytometry with Annexin V/propidium iodide. The treatments were as follows: eto - etoposide, 5  $\mu$ M; cis-cisplatinum, 30  $\mu$ M; UV – irradiation with 20J/m<sup>2</sup> UVC; tax - Taxol, 200 nM; MG132 (proteasome inhibitor) at 2  $\mu$ m, per = hydrogen peroxide at 350 mM for 15 minutes; -ser: incubation in media without serum for 24 hours. All results are representative of at least two experiments performed

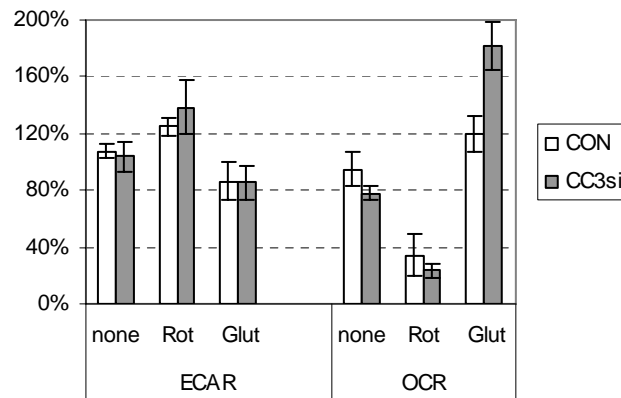

**Fig. S2.** Glutamine is used as a substrate for mitochondrial respiration in HeLaCC3si cells. HeLa lines were cultured overnight without glutamine, and for the last 2 hours in media with low (2.2 mM) glucose. Metabolic fluxes were examined before (none) and after addition to cultures of either 1  $\mu$ M rotenone (Rot) or 4 mM glutamine (Glut). Results are expressed as percentages of ECAR and OCR in cells maintained in the full media in the same experiment

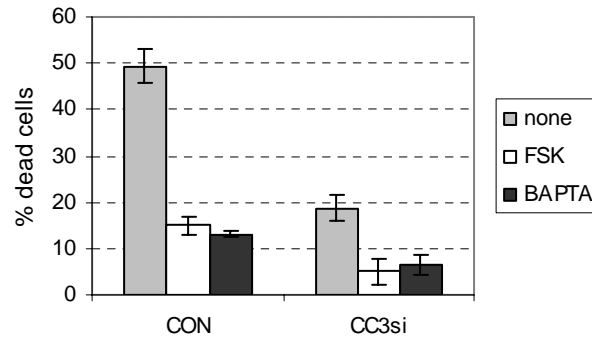

**Fig. S3.** HeLa cell lines were incubated in medium containing 0.55 mM glucose for 24 hours in absence of inhibitors (none) or presence of 10  $\mu$ M FSK or 4  $\mu$ M BAPTA. Cell death was analyzed by flow cytometry with Annexin V/propidium iodide. Chart shows percentage of cells positive for PI uptake. Results are average of three experiments.

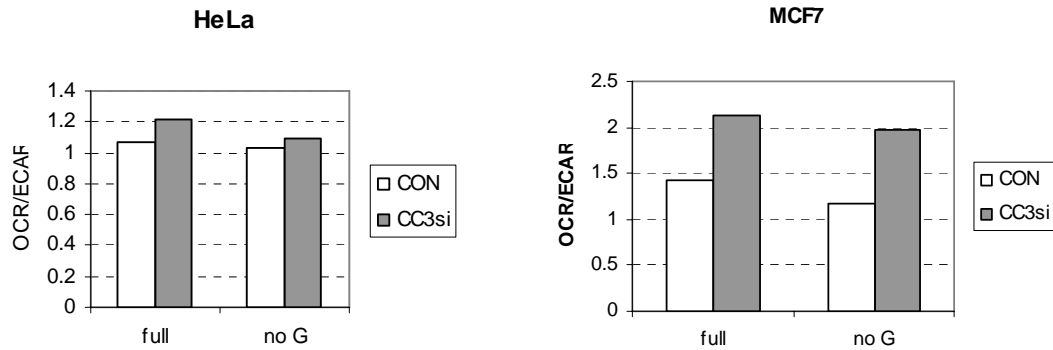

**Fig. S4.** Relative ratios of OCR to ECAR in HELA and MCF7 cell lines cultured in full medium (full) or in medium lacking glucose for 4 hours (no G). Charts present results in Figures 3A and B in a different manner: the average normalised values of OCR and ECAR were used to calculate the OCR/ECAR ratios.
